# Supplementary material for: Clinical Spectrum and Comorbidities of Dravet Syndrome in Taiwan&nbsp;
Source: Research Square preprint supplement (doi:10.21203/rs.3.rs-199977/v1), 2021-02-17
Supplement: Supplementary file 1 [file b245a5ed0814c3a1d00c6d5e.docx]

**Clinical spectrum and comorbidities of Dravet Syndrome in Taiwan**

Chia-Hsuan Huang1, [Pi-Lien Hung](https://pubmed.ncbi.nlm.nih.gov/?term=Hung+PL&cauthor_id=14984898)2, [Pi-Chuan Fan](https://pubmed.ncbi.nlm.nih.gov/?term=Fan+PC&cauthor_id=31662417)3, Kuang-Lin Lin4, Ting-Rong Hsu5, I-Jun Chou4, [Che-Sheng Ho](https://pubmed.ncbi.nlm.nih.gov/?term=Ho+CS&cauthor_id=23920131)6, I-Ching Chou7, Wei-Sheng Lin5, Inn-Chi Lee8, Hueng-Chuen Fan9, Shyi-Jou Chen10, [Jao-Shwann Liang](https://pubmed.ncbi.nlm.nih.gov/?term=Liang+JS&cauthor_id=31122804)11, [Yi-Fang Tu](https://pubmed.ncbi.nlm.nih.gov/?term=Tu+YF&cauthor_id=31541464)12, Tung-Ming Chang13, [Lee-Chin Wong](https://pubmed.ncbi.nlm.nih.gov/?term=Wong+LC&cauthor_id=31454984)14, Kun-Long Hung15, Wang-Tso Lee3,*

1Division of Pediatric Neurology, Department of Pediatrics. National Taiwan University Hospital Yunlin Branch, Yunlin County, Taiwan

2Department of Pediatric Neurology, Chang Gung Memorial Hospital-Kaohsiung, Kaohsiung, Taiwan

3Department of Pediatrics, National Taiwan University Hospital and National Taiwan University College of Medicine, Taipei, Taiwan.

4Division of Pediatric Neurology, Chang Gung Children's Hospital and Chang Gung Memorial Hospital, Chang Gung University College of Medicine, Taoyuan, Taiwan

5Department of Pediatrics, Taipei Veterans General Hospital, Taipei, Taiwan

6Department of Pediatrics, Mackay Memorial Hospital, Taipei, Taiwan

7Division of Pediatrics Neurology, China Medical University Children's Hospital, Taichung, Taiwan

8Department of Pediatrics, School of Medicine, Institute of Medicine, Chung Shan Medical University Hospital, Chung Shan Medical University, Taichung, Taiwan

9Department of Pediatrics, Tungs' Taichung Metroharbor Hospital, Taichung, Taiwan

10Department of Pediatrics, Tri-Service General Hospital, National Defense Medical Center, Taipei, Taiwan

11Department of Pediatrics, Far Eastern Memorial Hospital, New Taipei City, Taiwan

12Department of Pediatrics, National Cheng Kung University Hospital, College of Medicine, National Cheng Kung University, Tainan, Taiwan

13Department of Pediatric Neurology, Changhua Christian Children's Hospital Changhua, Taiwan

14Department of Pediatrics, Cathay General Hospital, Taipei, Taiwan

15 Department of Pediatrics, Fu-Jen Catholic University Hospital, New Taipei City, Taiwan

Supp Table 1. Influence of DS caregiving on Oberst Caregiving Burden Scale domain

| Distribution of responses | Response (n=38) | | | | | | |
| --- | --- | --- | --- | --- | --- | --- | --- |
| No problem | | Some problems | | Extreme problem | | |
| Additional household tasks | 8 | 21% | 25 | 66% | 5 | 13% | |
| Symptoms observation | 9 | 24% | 28 | 74% | 1 | 3% | |
| Further medical plan | 9 | 24% | 24 | 63% | 5 | 13% | |
| Financial problem | 13 | 34% | 18 | 47% | 7 | 18% | |
| Medical or nursing treatments | 13 | 34% | 20 | 53% | 5 | 13% | |
| Medication use | 14 | 37% | 21 | 55% | 3 | 8% | |
| Patient care | 16 | 42% | 19 | 50% | 3 | 8% | |
| Mobility | 19 | 50% | 18 | 47% | 1 | 3% | |
| Supp Table 2. Most common caregiver concerns | | | | | | |  | |
| **Concern** | | | | | | | **n=38** | |
| Lack of independence/constant care | | | | | | | 23(60.5%) | |
| Seizure control | | | | | | | 22 (57.9%) | |
| Speech/communication | | | | | | | 19 (50%) | |
| Sibling impacts/Long-term care when parents are gone | | | | | | | 19 (50%) | |
| Cognitive/developmental delay/regression | | | | | | | 11(28.9%) | |
| Behavioral issues including violence and autistic traits | | | | | | | 3(7.9%) | |
| SUDEP or death | | | | | | | 4(10.5%) | |
| Anxiety/depression/isolation | | | | | | | 2(5.2%) | |
| Finances | | | | | | | 7(18.4%) | |
| Medication side effects | | | | | | | 5(13.2%) | |
| Caregivers were asked to “List the top 3 concerns for the patient or family” after seizure control in open response. | | | | | | | | |
